# Supplementary figures and images for: Metallic and bi-metallic Janus nanofibers: electrical and self-propulsion properties
Source: Royal Society of Chemistry journal article supplement (doi:10.1039/c3tc30176a), 2013-01-01

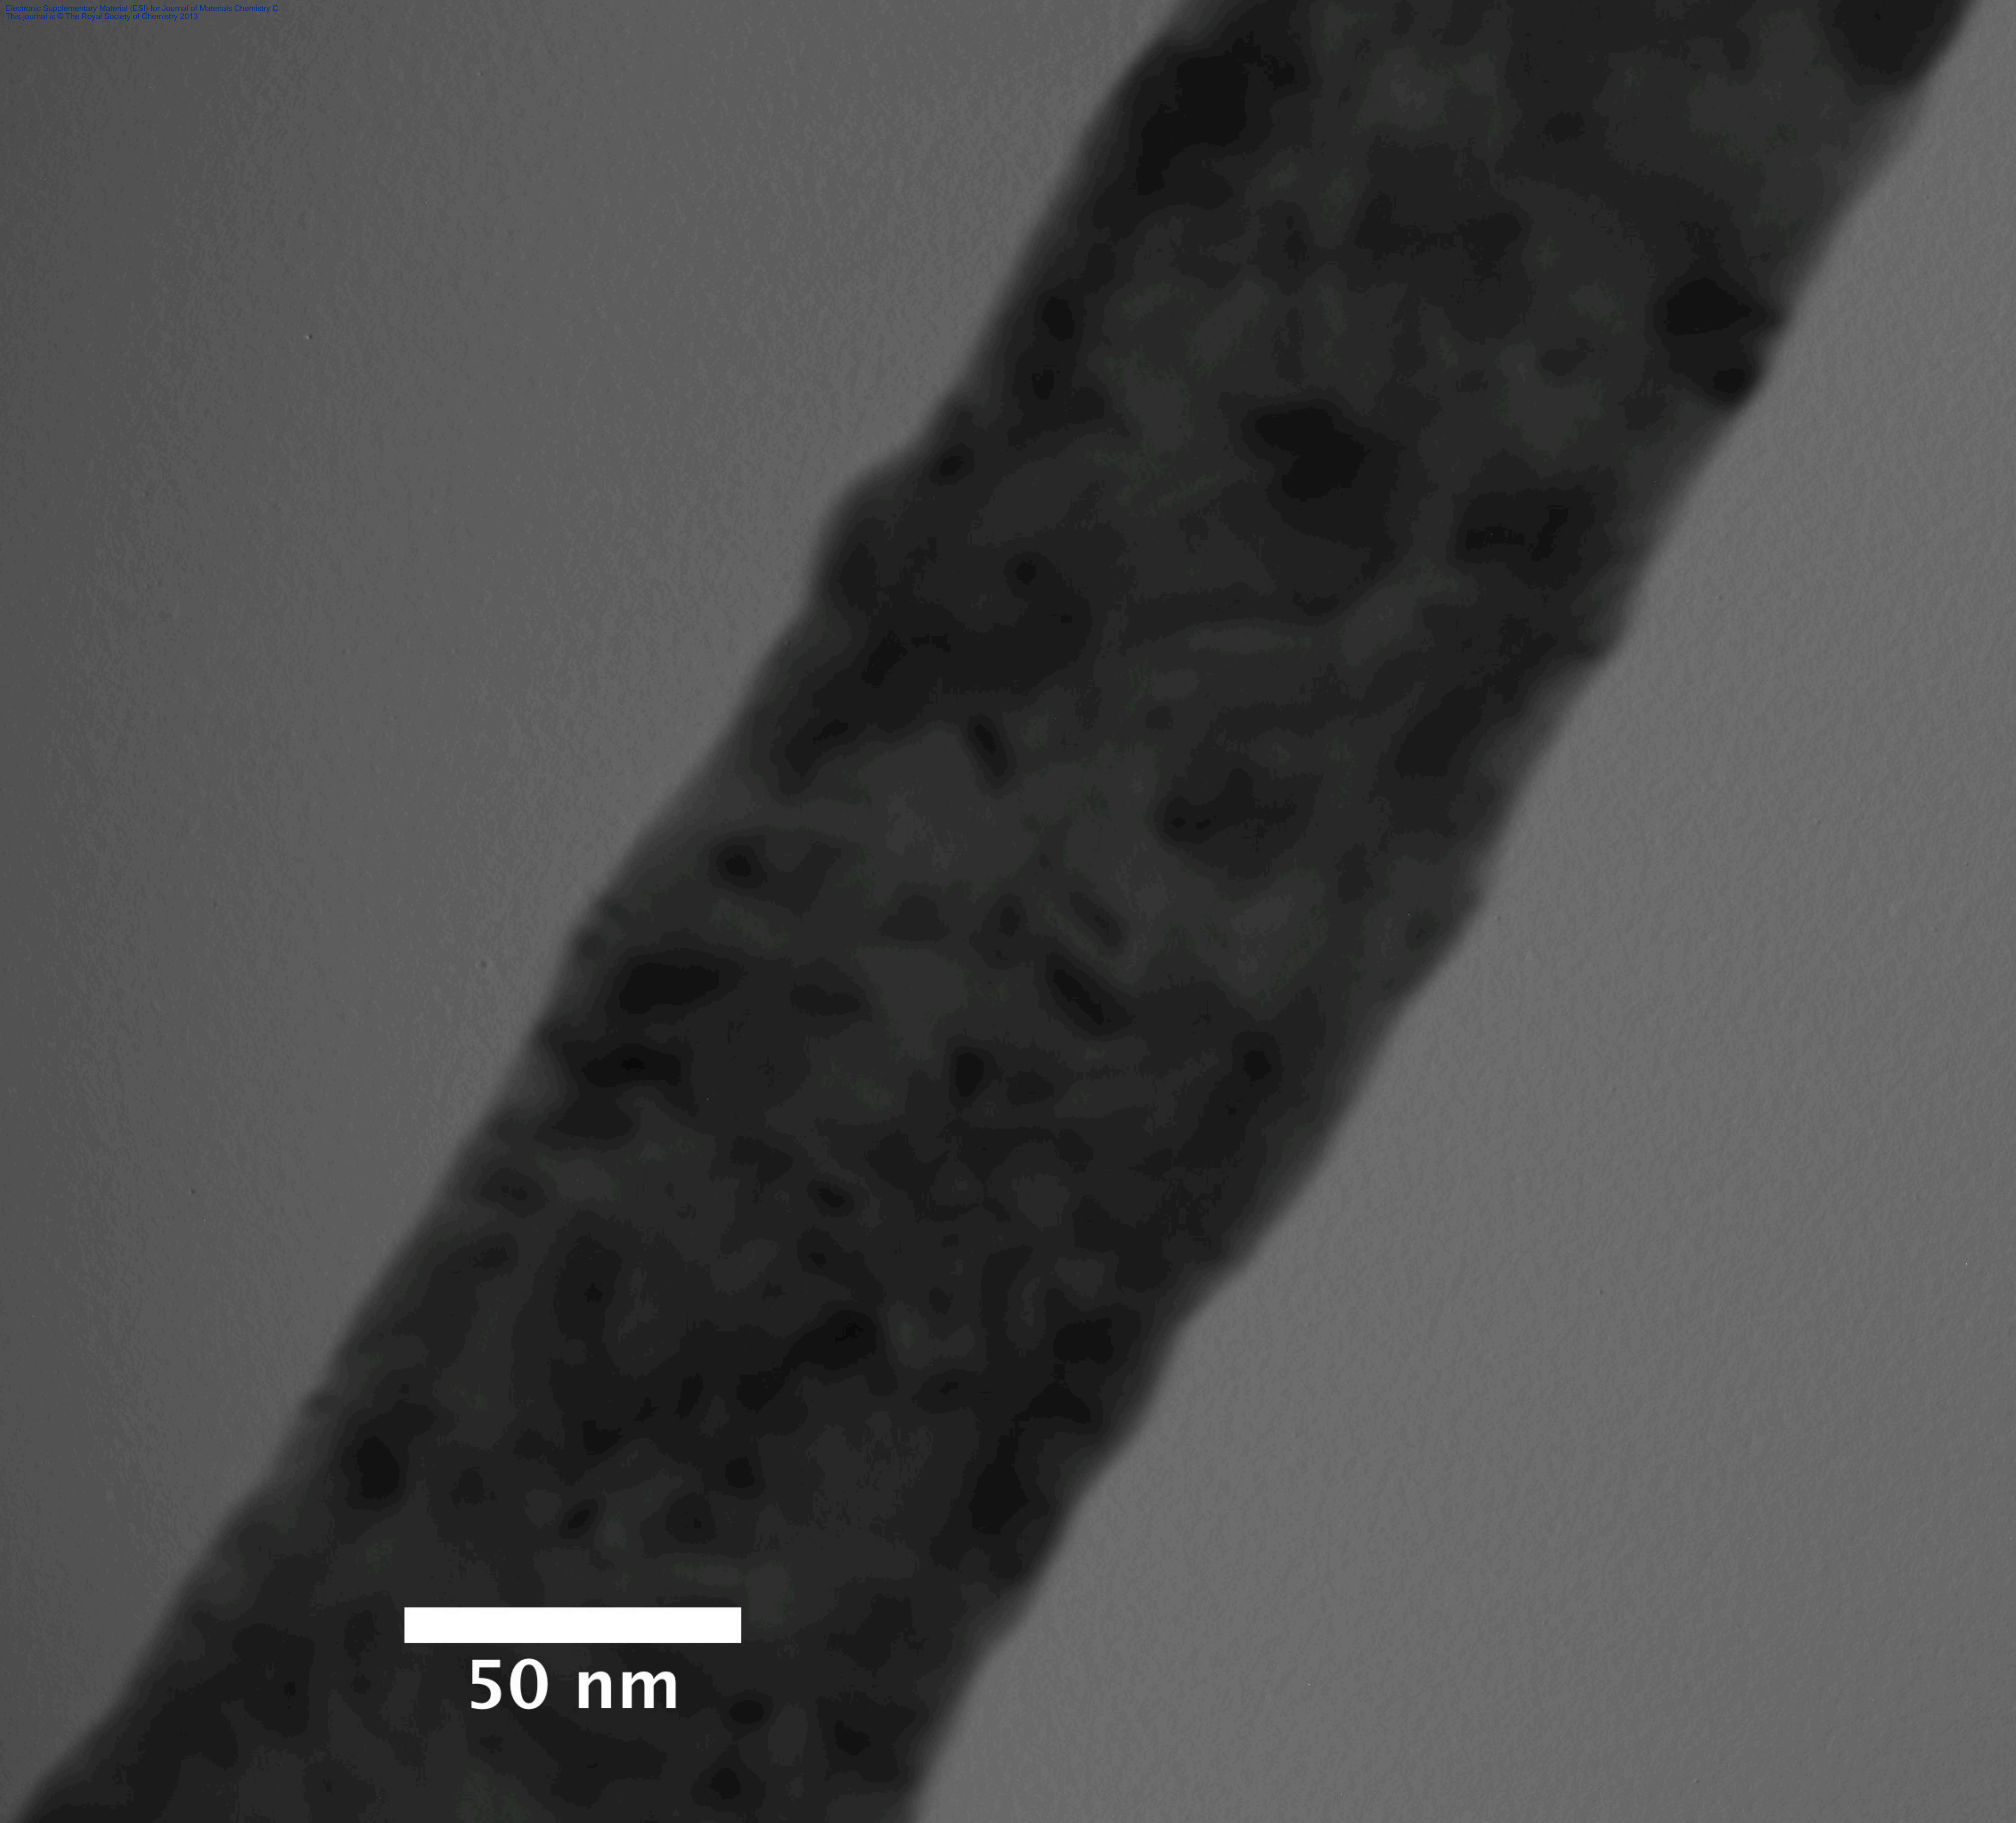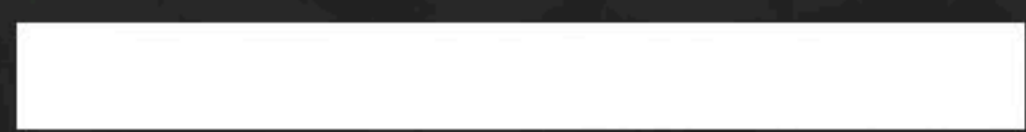

50 nm

Supplement: c3tc30176a.pdf [file c3tc30176a.pdf]
